# Supplementary material for: Fabrication and electrochemical performance of unprecedented POM-based metal–carbene frameworks
Source: Royal Society of Chemistry journal article supplement (doi:10.1039/c7ta05254e), 2017-01-01
Supplement: c7ta05254e1.pdf [file c7ta05254e1.pdf]

## Supporting Information

### **Fabrication and Electrochemical Performance of Unprecedented POM-Based Metal-Carbene Frameworks**

Pei-Pei Zhu,<sup>a</sup> Ning Sheng,<sup>a</sup> Meng-Ting Li,<sup>c</sup> Ji-Sen Li,<sup>a</sup> Guo-Dong Liu,<sup>a</sup> Xi-Ya Yang,<sup>a</sup>  
Jing-Quan Sha,<sup>a,b\*</sup> Meng-Liang Zhu,<sup>b</sup> and Jianzhuang Jiang<sup>b\*</sup>

<sup>a</sup> *Key Laboratory of Inorganic Chemistry in Universities of Shandong, Department of Chemistry and Chemical Engineering, Jining University, Qufu, Shandong, 273155, China. \*E-mail: [shajq2002@126.com](mailto:shajq2002@126.com)*

<sup>b</sup> *Beijing Key Laboratory for Science and Application of Functional Molecular and Crystalline Materials, University of Science and Technology Beijing, Beijing 100083, China. \*E-mail: [jianzhuang@ustb.edu.cn](mailto:jianzhuang@ustb.edu.cn)*

<sup>c</sup> *Institute of Functional Material Chemistry, National & Local United Engineering Laboratory for Power Batteries, Northeast Normal University, Changchun, 130024 Jilin, China*

## Experimental Section

All chemical materials were commercially purchased and used without further purification. The Elemental analyses(C, H, and N) were measured by the Perkin-Elmer 2400 CHN elemental analyzer. The FT-IR was obtained from the Alpha Centaur FT/IR spectrometer with KBr pellets. The power X-ray diffraction (PXRD) patterns were scanned by the Rigaku D/MAX 2500 V XRD diffractometer with Cu-K $\alpha$  radiation. The TG analyses were performed on a Perkin-Elmer TGA7 instrument in flowing N<sub>2</sub> with a heating rate of 10 °C min<sup>-1</sup>. Galvanostatic charge/discharge cycles were performed on a LAND 2001A Battery Tester between 0.01 and 3.00 V at various current densities. Cyclic voltammetry measurements were carried out on an electrochemical workstation (CHI750D) in the potential range of 0.01 - 3.00 V vs. Li<sup>+</sup>/Li at a scan rate of 0.1 mV s<sup>-1</sup>.

**Synthesis of [Cu<sub>10</sub>(H<sub>3</sub>trz)<sub>4</sub>(Htrz)<sub>4</sub>] (HPW<sub>12</sub>O<sub>40</sub>) (1).** H<sub>3</sub>PW<sub>12</sub>O<sub>40</sub> (300 mg, 0.15 mmol), Cu(CH<sub>3</sub>COO)<sub>2</sub> (150 mg, 0.75 mmol) and 1,2,4-trz ligand (80 mg, 1.16 mmol) were dissolved in distilled water (10 mL) with stirring for 30 min at room temperature, and pH value was adjusted to *ca.* 1.5 by 1 M HCl. The resulting solution was transferred and sealed in a 20 mL Teflon-lined stainless steel reactor and heated at 180 °C for 5 days. After the autoclave was cooled to room temperature at 10 °C·h<sup>-1</sup>, the black block crystals of **1** were obtained, and then washed with distilled water and air-dried (yield: 46% based on Cu). Elemental analysis: Anal. calcd for C<sub>16</sub>H<sub>17</sub>Cu<sub>10</sub>N<sub>24</sub>O<sub>40</sub>PW<sub>12</sub> (4058.08): C 4.75, H 0.42 and N 8.28 %; Found C 4.70, H 0.51 and N 8.26 %. IR (KBr pellet, cm<sup>-1</sup>): 3434 (*m*), 3106 (*w*), 1633 (*m*), 1484 (*m*), 1284 (*m*), 1164 (*m*), 1056 (*s*), 941 (*s*), 804 (*vs*), 653 (*s*), 514 (*m*).

**Synthesis of [Cu<sub>10</sub>(H<sub>3</sub>trz)<sub>4</sub>(Htrz)<sub>4</sub>] (H<sub>2</sub>SiW<sub>12</sub>O<sub>40</sub>) (2).** The preparation of **2** was similar to **1**, except that the H<sub>3</sub>PW<sub>12</sub>O<sub>40</sub> was replaced by H<sub>4</sub>SiW<sub>12</sub>O<sub>40</sub>. The black block crystals of **2** (yield: 43% based on Cu) were successfully isolated. Elemental analysis: Anal. calcd for C<sub>16</sub>H<sub>18</sub>Cu<sub>10</sub>N<sub>24</sub>O<sub>40</sub>SiW<sub>12</sub> (4056.21): C 4.74, H 0.45 and N 8.26%; Found C 4.71, H 0.49 and N 8.21%. IR (KBr pellet, cm<sup>-1</sup>): 3434 (*m*), 3104 (*w*), 1484 (*m*), 1284 (*m*), 1164 (*m*), 929 (*m*), 887 (*s*), 792 (*vs*), 653 (*s*), 530 (*m*).

**X-ray Crystallographic Measurements.** Crystallographic data for **1** and **2** were collected on the Bruker SMART-CCD diffractometer with Mo-K $\alpha$  radiation ( $\lambda$  =

0.71073 Å) at room temperature. The structures of **1** and **2** were resolved and refined by the direct method and refined full-matrix least squares on  $F^2$  through the *SHELXTL* and *WINGX* software package.<sup>1</sup> All non-hydrogen atoms were refined anisotropically and the some ADP and NDP error atoms in **1** and **2** were refined through the ISOR, DELU and SIMU command. The crystal data and selected bond lengths and angles of **1** and **2** are listed in Tables S2-S4 (Supporting information). The CCDC reference numbers of **1** and **2** are 1515264 and 1515265, respectively.

**Battery analyses.** The mixture of the samples (**1/2**/(NBu<sub>4</sub>)<sub>3</sub>[PW<sub>12</sub>O<sub>40</sub>]/(NBu<sub>4</sub>)<sub>4</sub>[SiW<sub>12</sub>O<sub>40</sub>]), Super-P carbon and polyvinylidene fluoride (PVDF) at a weight ratio 7:2:1 was passed on the pure Cu foil and followed by drying in vacuum at 50°C for 24 h. The loading mass of electroactive materials in electrode slurry is ~2 mg·cm<sup>-2</sup>. The testing coin cells were assembled in an argon-filled glovebox with the working electrode as-fabricated, metallic lithium foil as the counter electrode, and 1.0 M LiPF<sub>6</sub> in ethylene carbonate/diethyl carbonate (1:1 v/v) as the electrolyte.

## References

- [1] (a) G. M. Sheldrick, *SHELX-97, Program for Crystal Structure Refinement, University of Göttingen, Germany*. 1997; (b) G. M. Sheldrick, *SHELXL-97, Program for Crystal Structure Solution, University of Göttingen, Germany*. 1997.

**Table S1.** Structural information of POMs and Cu ions and asymmetric unit of compounds **1** and **2**.

| Compound 1                                                                              | Compound 2                                                                                        |
|-----------------------------------------------------------------------------------------|---------------------------------------------------------------------------------------------------|
| 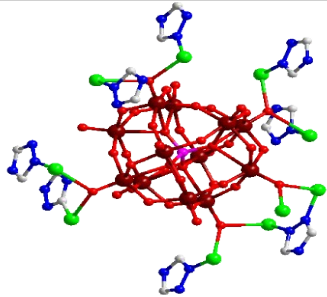       |                 |
| $[\text{Cu}_{10}(\text{H}_3\text{trz})_4(\text{Htrz})_4](\text{HPW}_{12}\text{O}_{40})$ | $[\text{Cu}_{10}(\text{H}_3\text{trz})_4(\text{Htrz})_4](\text{H}_2\text{SiW}_{12}\text{O}_{40})$ |
|        |                 |
|      |               |
|      |               |

\* Htrz = trz-I and H<sub>3</sub>trz= trz-II, trz = 1,2,4-triazole

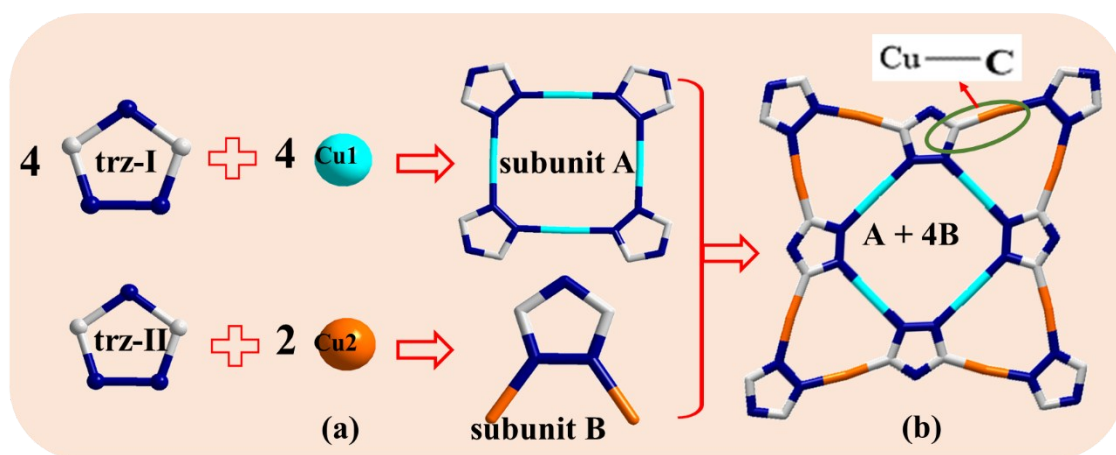

**Figure S1.** Representation of the  $[\text{Cu}_{12}(\text{trz})_8]^{4+}$  metallamacrocycles generated by the subunit A subunits B copper-carbon bonds in compounds **1** and **2**.

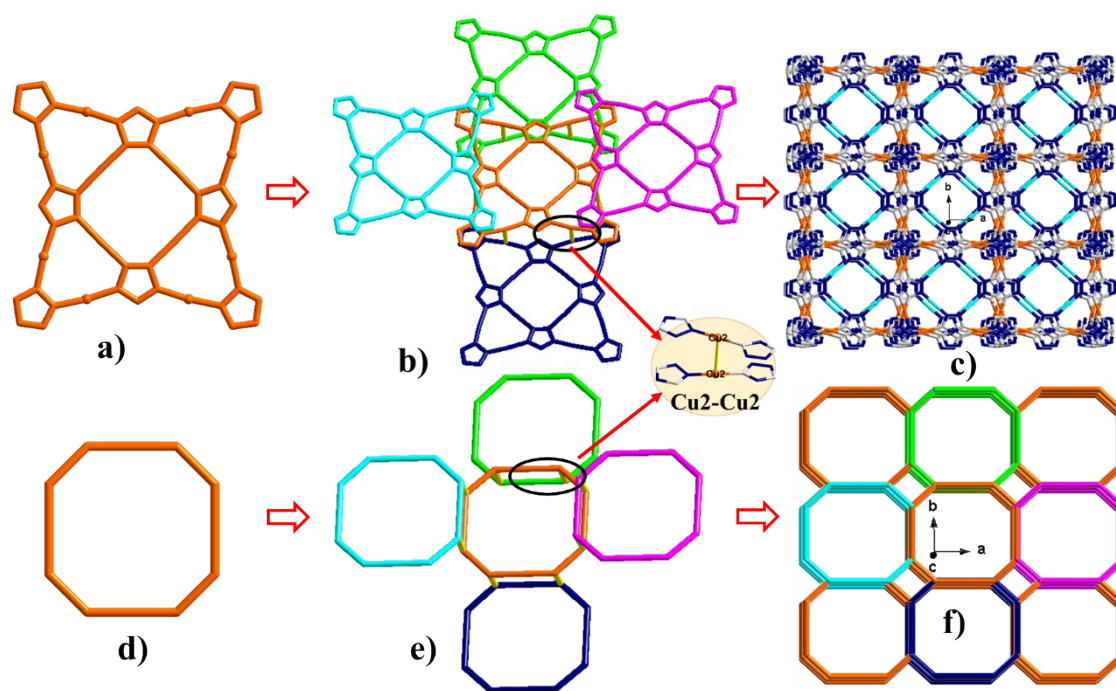

**Figure S2.** Ball/stick and topology representation of each  $[\text{Cu}_{12}(\text{trz})_8]^{4+}$  metallamacrocycles connecting the surrounding five  $[\text{Cu}_{12}(\text{trz})_8]^{4+}$  metallamacrocycles to construct the 3D metal-organic frameworks *via* the  $\text{Cu}_2-\text{Cu}_2$  interaction.

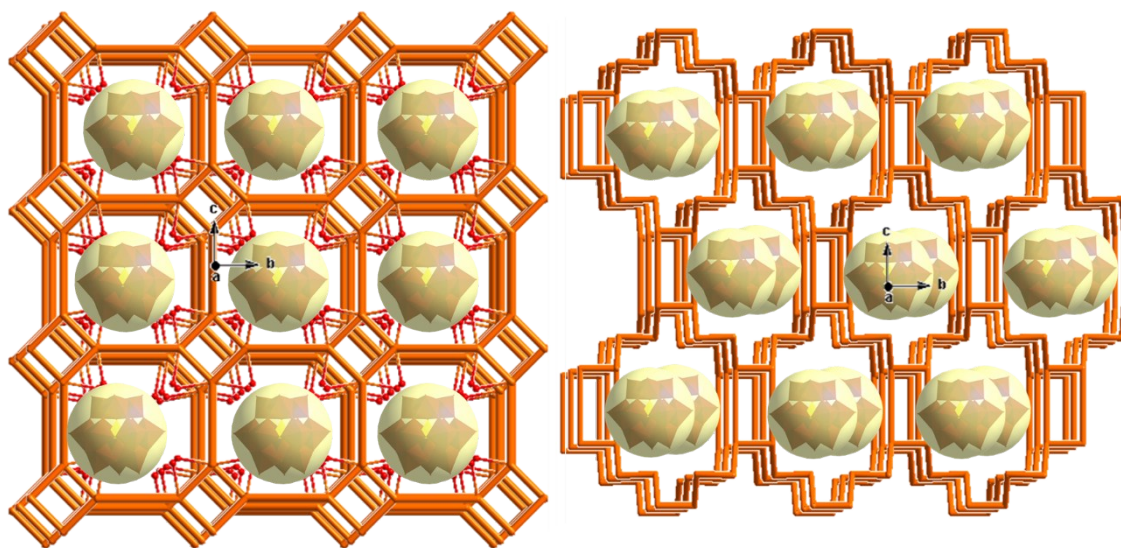

**Figure S3.** Combined ball-stick and topological representation of the POM clusters inserted into the 3D metal-organic carbene frameworks *via* the Cu-O interaction compound **1** and **2**.

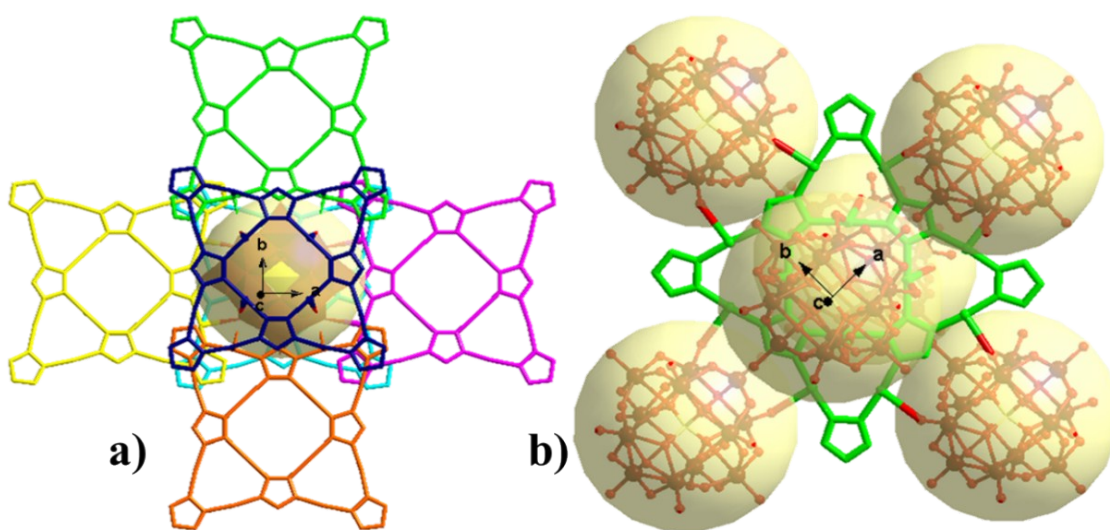

**Figure S4.** The Combined ball-stick representation of (a) each POM clusters surrounded by six  $[\text{Cu}_{12}(\text{trz})_8]^{4+}$  metallamacrocycles and (b) each  $[\text{Cu}_{12}(\text{trz})_8]^{4+}$  metallamacrocycles also surrounded by six POM clusters.



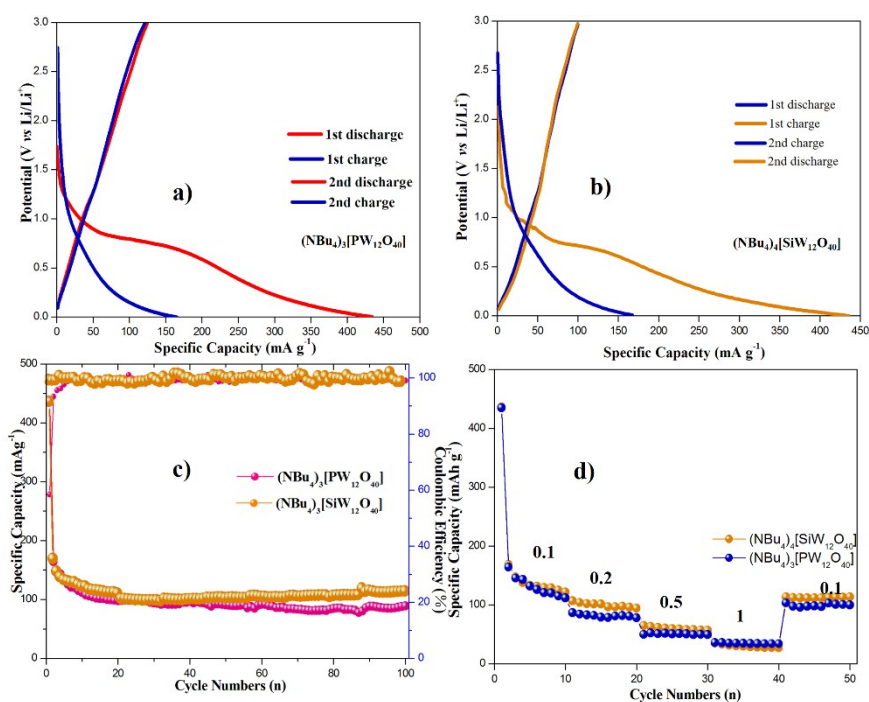

**Figure S5.** The charge-discharge curves of (a) (NBu<sub>4</sub>)<sub>3</sub>[PW<sub>12</sub>O<sub>40</sub>] and (b) (NBu<sub>4</sub>)<sub>4</sub>[SiW<sub>12</sub>O<sub>40</sub>] anodes during the initial two cycles at a current density 100 mA·g<sup>-1</sup>. (c) The discharge capacity and the coulombic efficiency of (NBu<sub>4</sub>)<sub>3</sub>[PW<sub>12</sub>O<sub>40</sub>] and (NBu<sub>4</sub>)<sub>4</sub>[SiW<sub>12</sub>O<sub>40</sub>] anodes at a current density 100 mA·g<sup>-1</sup>; (d) Rate performance of (NBu<sub>4</sub>)<sub>3</sub>[PW<sub>12</sub>O<sub>40</sub>] and (NBu<sub>4</sub>)<sub>4</sub>[SiW<sub>12</sub>O<sub>40</sub>] anodes at current densities of 100 mA·g<sup>-1</sup> to 1 A·g<sup>-1</sup>.

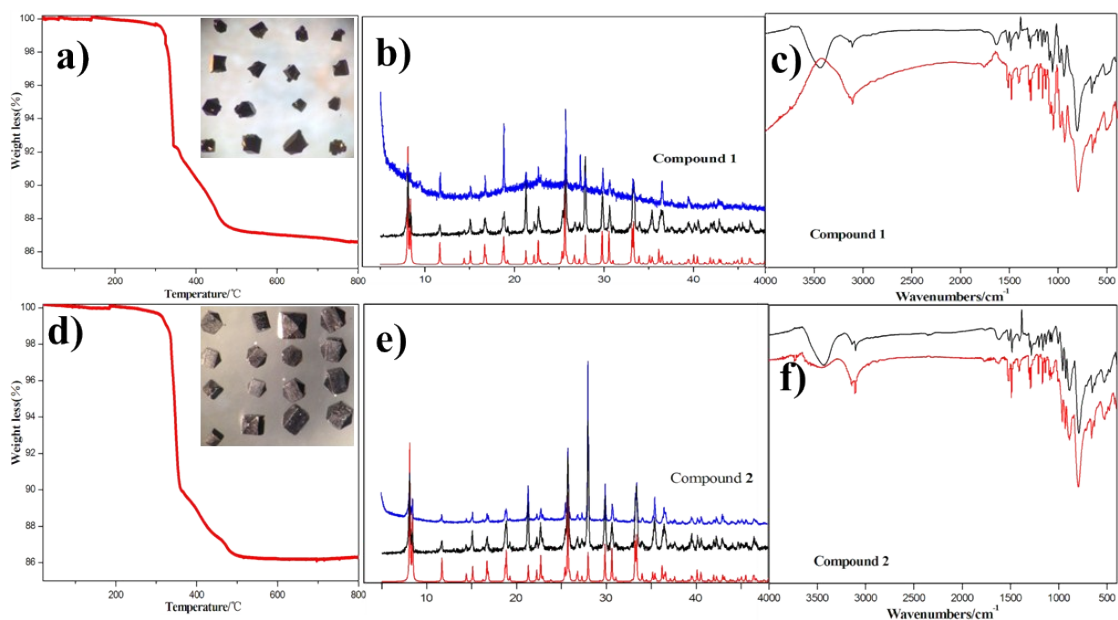

**Figure S6.** The TG curve of (a) **1** and (d) **2**; the simulative (red), experimental (room temperature, black) and experimental (heated, blue) PXRD patterns for (b) **1** and (e) **2**; the room temperature (black) and heated (red) IR spectra of (c) **1** and (f) **2**, respectively.

**Table S2.** Crystallographic data and structural refinements for **1** and **2**.

| Compounds                                       | Compound 1                                                                                        | Compound 2                                                                                         |
|-------------------------------------------------|---------------------------------------------------------------------------------------------------|----------------------------------------------------------------------------------------------------|
| Chemical formula                                | C <sub>16</sub> H <sub>17</sub> Cu <sub>10</sub> N <sub>24</sub> O <sub>40</sub> PW <sub>12</sub> | C <sub>16</sub> H <sub>18</sub> Cu <sub>10</sub> N <sub>24</sub> O <sub>40</sub> SiW <sub>12</sub> |
| CCDC no.                                        | 1515264                                                                                           | 1515265                                                                                            |
| Formula weight                                  | 4058.08                                                                                           | 4056.21                                                                                            |
| Temperature (K)                                 | 296(2)                                                                                            | 296(2)                                                                                             |
| Wavelength (Å)                                  | 0.71073                                                                                           | 0.71073                                                                                            |
| Crystal system                                  | tetragonal                                                                                        | tetragonal                                                                                         |
| Space group                                     | <i>I41/amd</i>                                                                                    | <i>I41/amd</i>                                                                                     |
| a(Å)                                            | 21.0740(19)                                                                                       | 21.0434(8)                                                                                         |
| b(Å)                                            | 21.0740(19)                                                                                       | 21.0434(8)                                                                                         |
| c(Å)                                            | 12.766(2)                                                                                         | 12.7594(9)                                                                                         |
| α(°)                                            | 90                                                                                                | 90                                                                                                 |
| β(°)                                            | 90                                                                                                | 90                                                                                                 |
| γ(°)                                            | 90                                                                                                | 90                                                                                                 |
| V(Å <sup>3</sup> ) / Z                          | 5669.6(14)/4                                                                                      | 5650.2(6)/ 4                                                                                       |
| Density (g·cm <sup>-3</sup> )                   | 4.744                                                                                             | 4.756                                                                                              |
| Abs coeff. (mm <sup>-1</sup> )                  | 30.210                                                                                            | 30.224                                                                                             |
| F(000)                                          | 7140.0                                                                                            | 7136.0                                                                                             |
| Data collect θ range                            | 1.87-25.00 °                                                                                      | 1.867 - 25.000°                                                                                    |
| Reflns collected                                | 13238                                                                                             | 13568                                                                                              |
| Independent reflns                              | 1334                                                                                              | 1327                                                                                               |
| Rint                                            | 0.0636                                                                                            | 0.0356                                                                                             |
| Data/restraints/parameters                      | 1334/ 24/ 95                                                                                      | 1327/ 0/ 131                                                                                       |
| Goodness-of-fit on F <sup>2</sup>               | 1.116                                                                                             | 1.162                                                                                              |
| Final R indices [I > 2δ(I)]                     | R <sub>1</sub> = 0.0414, wR <sub>2</sub> = 0.1070                                                 | R <sub>1</sub> = 0.0221, wR <sub>2</sub> = 0.0575                                                  |
| R indices (all data)                            | R <sub>1</sub> = 0.0501, wR <sub>2</sub> = 0.1176                                                 | R <sub>1</sub> = 0.0235, wR <sub>2</sub> = 0.0581                                                  |
| Largest diff. peak and hole(e·Å <sup>-3</sup> ) | 12.801 and -2.354                                                                                 | 3.386 and -1.167                                                                                   |

$$R_1 = \Sigma(|F_0| - |F_c|) / \Sigma|F_0|, wR_2 = \Sigma w(|F_0|^2 - |F_c|^2)^2 / \Sigma w(|F_0|^2)^{1/2}$$

**Table S3.** Bond lengths [Å] and angles [°] for compound **1**.

| Compound 1 |           |             |           |
|------------|-----------|-------------|-----------|
| Bonds      | Lengths   | Bonds       | Lengths   |
| C(1)-Cu(2) | 1.885(10) | O(7)-W(2)#2 | 2.424(6)  |
| N(1)-Cu(2) | 1.901(11) | O(7)-W(2)   | 2.424(6)  |
| N(2)-Cu(1) | 1.968(14) | O(7)-W(1)   | 2.428(6)  |
| O(2)-W(2)  | 1.914(8)  | P(1)-O(7)#4 | 1.546(10) |
| O(2)-W(1)  | 1.934(8)  | P(1)-O(7)#5 | 1.546(9)  |



| O(3)-W(2)#3        | 1.914(8) | P(1)-O(7)#3      | 1.546(10) |
|--------------------|----------|------------------|-----------|
| O(3)-W(1)          | 1.924(8) | O(1)-W(1)        | 1.687(6)  |
| O(5)-W(2)          | 1.718(6) | O(4)-W(2)#6      | 1.908(6)  |
| O(6)-W(2)#2        | 1.912(7) | O(4)-W(2)        | 1.908(6)  |
| O(6)-W(2)          | 1.912(7) | Cu(1)-N(2)#1     | 1.968(14) |
| O(7)-P(1)          | 1.546    | Cu(2)-Cu(2)#7    | 3.002(4)  |
| W(1)-O(2)#2        | 1.934(8) | W(1)-O(3)#2      | 1.924(8)  |
| Bonds              | Angles   | Bonds            | Angles    |
| O(7)#4-P(1)-O(7)#5 | 109.7(9) | O(3)#2-W(1)-O(7) | 83.6(3)   |
| O(7)#4-P(1)-O(7)   | 109.7(3) | O(2)#2-W(1)-O(7) | 72.9(3)   |
| O(7)#5-P(1)-O(7)   | 109.1(2) | O(2)-W(1)-O(7)   | 72.9(3)   |
| O(7)#4-P(1)-O(7)#3 | 109.1(7) | O(5)-W(2)-O(4)   | 101.3(3)  |
| O(7)#5-P(1)-O(7)#3 | 109.7(9) | O(5)-W(2)-O(6)   | 102.8(3)  |
| O(7)-P(1)-O(7)#3   | 109.7(3) | O(4)-W(2)-O(6)   | 88.7(3)   |
| N(2)#1-Cu(1)-N(2)  | 177.7(9) | O(5)-W(2)-O(3)#3 | 101.3(3)  |
| C(1)-Cu(2)-N(1)    | 171.9(5) | O(4)-W(2)-O(3)#3 | 85.5(3)   |
| C(1)-Cu(2)-Cu(2)#7 | 91.7(3)  | O(6)-W(2)-O(3)#3 | 155.9(3)  |
| N(1)-Cu(2)-Cu(2)#7 | 93.1(4)  | O(5)-W(2)-O(2)   | 101.5(3)  |
| O(1)-W(1)-O(3)     | 102.2(3) | O(4)-W(2)-O(2)   | 157.0(3)  |
| O(1)-W(1)-O(3)#2   | 102.2(3) | O(6)-W(2)-O(2)   | 88.6(3)   |
| O(3)-W(1)-O(3)#2   | 86.7(5)  | O(3)#3-W(2)-O(2) | 87.7(4)   |
| O(1)-W(1)-O(2)#2   | 101.5(3) | O(5)-W(2)-O(7)   | 173.0(4)  |
| O(3)-W(1)-O(2)#2   | 156.3(4) | O(4)-W(2)-O(7)   | 84.2(2)   |
| O(3)#2-W(1)-O(2)#2 | 88.0(4)  | O(6)-W(2)-O(7)   | 72.7(2)   |
| O(1)-W(1)-O(2)     | 101.5(3) | O(3)#3-W(2)-O(7) | 83.4(3)   |
| O(3)-W(1)-O(2)     | 88.0(4)  | O(2)-W(2)-O(7)   | 73.2(3)   |
| O(3)#2-W(1)-O(2)   | 156.3(4) | O(1)-W(1)-O(7)   | 172.0(3)  |
| O(2)#2-W(1)-O(2)   | 87.6(5)  | O(3)-W(1)-O(7)   | 83.6(3)   |

#1  $y+1/4, x-1/4, -z+1/4$ ; #2  $-x+1, y, z$ ; #3  $-y+3/4, -x+3/4, -z+5/4$ ; #4  $y+1/4, x-1/4, -z+5/4$ ; #5  $-x+1, -y+1/2, z$ ; #6  $x, -y+1/2, z$ ; #7  $x, -y, -z$

**Table S4.** Bond lengths [Å] and angles [°] for compound **2**.

| Compound 2  |            |             |          |
|-------------|------------|-------------|----------|
| Bonds       | Lengths    | Bonds       | Lengths  |
| C(1)-Cu(1)  | 1.883(7)   | O(5)-Si(1)  | 1.629(7) |
| N(1)-Cu(1)  | 1.890(6)   | O(5)-W(1)   | 2.340(5) |
| N(4)-Cu(2)  | 1.967(9)   | O(5)-W(1)#5 | 2.340(5) |
| O(2)-W(1)#4 | 1.9081(17) | O(5)-W(2)   | 2.354(7) |
| O(2)-W(1)   | 1.9081(17) | O(6)-W(1)   | 1.911(5) |

| O(3)-W(2)           | 1.701(8)  | O(6)-W(2)#6         | 1.929(5)  |
|---------------------|-----------|---------------------|-----------|
| O(4)-W(1)           | 1.921(5)  | O(7)-W(1)           | 1.717(5)  |
| O(4)-W(2)           | 1.939(5)  | O(10)-W(1)          | 1.910(3)  |
| Si(1)-O(5)#8        | 1.629(7)  | O(10)-W(1)#5        | 1.910(3)  |
| Cu(1)-Cu(1)#2       | 2.996(2)  | Si(1)-O(5)#6        | 1.629(7)  |
| Cu(2)-N(4)#9        | 1.967(9)  | Si(1)-O(5)#7        | 1.629(7)  |
| W(2)-O(6)#6         | 1.929(5)  | W(2)-O(4)#5         | 1.939(5)  |
| Bonds               | Angles    | Bonds               | Angles    |
| O(5)-Si(1)-O(5)#6   | 109.9(2)  | O(7)-W(1)-O(4)      | 99.4(2)   |
| O(5)-Si(1)-O(5)#7   | 108.5(5)  | O(2)-W(1)-O(4)      | 159.0(3)  |
| O(5)#6-Si(1)-O(5)#7 | 109.9(2)  | O(10)-W(1)-O(4)     | 89.9(3)   |
| O(5)-Si(1)-O(5)#8   | 109.9(2)  | O(6)-W(1)-O(4)      | 87.6(2)   |
| O(5)#6-Si(1)-O(5)#8 | 108.5(5)  | O(7)-W(1)-O(5)      | 172.0(2)  |
| O(5)#7-Si(1)-O(5)#8 | 109.9(2)  | O(2)-W(1)-O(5)      | 85.1(3)   |
| C(1)-Cu(1)-N(1)     | 171.6(3)  | O(10)-W(1)-O(5)     | 73.7(2)   |
| C(1)-Cu(1)-Cu(1)#2  | 91.4(2)   | O(6)-W(1)-O(5)      | 84.36(19) |
| N(1)-Cu(1)-Cu(1)#2  | 93.1(2)   | O(4)-W(1)-O(5)      | 74.5(2)   |
| N(4)-Cu(2)-N(4)#9   | 177.7(5)  | O(3)-W(2)-O(6)#6    | 100.9(2)  |
| O(7)-W(1)-O(2)      | 101.4(3)  | O(3)-W(2)-O(6)#10   | 100.9(2)  |
| O(7)-W(1)-O(10)     | 101.6(3)  | O(6)#6-W(2)-O(6)#10 | 85.9(3)   |
| O(2)-W(1)-O(10)     | 89.0(3)   | O(3)-W(2)-O(4)      | 101.0(2)  |
| O(7)-W(1)-O(6)      | 100.7(2)  | O(6)#6-W(2)-O(4)    | 88.2(2)   |
| O(2)-W(1)-O(6)      | 85.6(2)   | O(6)#10-W(2)-O(4)   | 158.0(2)  |
| O(10)-W(1)-O(6)     | 157.7(2)  | O(3)-W(2)-O(4)#5    | 101.0(2)  |
| O(6)#6-W(2)-O(5)    | 84.52(19) | O(6)#6-W(2)-O(4)#5  | 158.0(2)  |
| O(6)#10-W(2)-O(5)   | 84.52(19) | O(6)#10-W(2)-O(4)#5 | 88.2(2)   |
| O(4)-W(2)-O(5)      | 73.83(17) | O(4)-W(2)-O(4)#5    | 89.4(3)   |
| O(4)#5-W(2)-O(5)    | 73.83(17) | O(3)-W(2)-O(5)      | 172.6(3)  |

#1 -x,-y+1,-z; #2 x,-y+1,-z; #3 -y+3/4,-x+3/4,-z+1/4; #4 -x, y, z; #5 x,-y+1/2,z; #6 y-1/4,x+1/4,-z+3/4;  
#7 -x,-y+1/2,z; #8 -y+1/4,-x+1/4,-z+3/4; #9 y-1/4,x+1/4,-z-1/4; #10 y-1/4,-x+1/4,-z+3/4
